# Supplementary material for: Hyperactivity and Hypermotivation Associated With Increased Striatal mGluR1 Signaling in a Shank2 Rat Model of Autism
Source: Front Mol Neurosci. 2018 Jun 19;11:107. doi: 10.3389/fnmol.2018.00107 (PMC6018399; doi:10.3389/fnmol.2018.00107)
Supplement: TABLE S1 — Comprehensive statistics table. [file Table_1.xlsx]

## Sheet: Sheet2
	Behavior	N	Statistical Test	Results	Post Hoc Test	Results		WT Mean	WT SEM	KO Mean	KO SEM
Figure 2
a.	Juvenile Behavior	WT: n=8, KO: n=8	2-WAY RM ANOVA (behavior (RM) X genotype)	Interation F (2,28)=3.602, p=0.0405	Sidak Multiple Comparison (KO vs. WT)	Nape attack t(42)=5.522, p<0.0001		18.375	2.10389	6	1.16496
				Behavior F(2,28)=14.23, p<0.0001		Pinning t(42)=2.231, p=0.0903		8.25	1.03078	3.25	1.12995
				Genotype F (1, 14) = 28.32, p=0.0001		Supine t(42)=3.179, p=0.0083		9.125	2.35613	2	1.18019
b.	Social Recognition	WT:n=13, KO: n=13	2-WAY RM ANOVA (trial (RM) X genotype)	Interaction F (1, 24) = 6.985, p=0.0142	Sidak Multiple Comparison (Trial 1 vs. Trial 2)	WT t(24)=4.637, p=0.0002	Trial 1	99.9392	4.63729	37.674	5.65853
				Trial F (1, 24) = 15.33, p=0.0007		KO(24)=0.8997, p=0.6122	Trial 2	71.1719	9.14243	32.0928	5.89586
				Genotype F (1, 24) = 38.5, p<0.0001
c.	Social Approach	WT: n=10, KO: n=10	2-WAY RM ANOVA (stimulus(RM) X genotype)	Interaction F (3, 54) = 0.01293, p=0.9980	Sidak Multiple Comparison (Animal 1 vs. Object)	WT: Animal 1 vs. Object t(54)=3.604, p=0.0041	Animal 1	69.26	21.3753	80.743	21.8497
				Stimulus F (3, 54) = 10.2 p<0.0001		KO: Animal 1 vs. Object t(54)=3.827, p=0.002	Object 1	16.11	4.30583	24.303	6.51326
				Genotype F (1, 18) = 0.4353 p=0.5178	Sidak Multiple Comparison (Animal 1 vs. Animal 2)	WT: Animal 1 vs. Animal 2 t(54)=1.005, p=0.9005	Animal 1	26.775	7.93758	38.66	14.6412
						KO: Animal 1 vs. Animal 2 t(54)=0.9503, p=0.9219	Animal 2	41.599	12.4917	52.674	16.3665
Figure 3.
a.	Distance Travelled	WT: n=11, KO: n=11	2-WAY RM ANOVA (genotype X time (RM))	Interaction F (5, 100) = 2.643 , p=0.0275	Sidak Multiple Comparison (WT vs. KO)	10 t(120)=4.829, p<0.0001		2351.09	172.727	5232.64	332.977
				Time F (5, 100) = 36.39 p<0.0001		20 t(120)=6.16, p<0.0001		1745.82	181.857	5422	472.112
				Genotype F (1, 20) = 32.46 , p<0.0001		30 t(120)=5.469, p<0.0001		1191.36	176.139	4455.18	554.868
						40 t(120)=5.266, p<0.0001		655	133.436	3797.91	597.692
						50 t(120)=4.74, p<0.0001		411	98.7511	3239.64	652.135
						60 t(120)=3.651, p<0.01		424.364	165.888	2603.27	750.795
b.	Rearing	WT: n=11, KO: n=11	2-WAY RM ANOVA (genotype X time (RM)	Interaction F (5, 100) = 2.808 , p=0.0205	Sidak Multiple Comparison (WT vs. KO)	10 t(120)=1.19, ns		412.091	21.6855	486.182	38.314
				Time F (5, 100) = 30.26 , p<0.0001		20 t(120)=2.909, p<0.05		277.455	30.2028	458.636	47.6831
				Genotype F (1, 20) = 15.81 , p=0.0007		30 t(120)=3.48, p<0.01		172.909	21.2412	389.636	45.2159
						40 t(120)=4.345, p<0.005		81.5455	21.2356	352.182	57.4576
						50 t(120)=4.049, p<0.005		62.4545	17.6359	314.636	71.591
						60 t(120)=2.894, 5<0.05		58	19.6557	238.273	77.9898
c.	Rotations	WT: n=11, KO: n=11	2-WAY RM ANOVA (genotype X time (RM))	Interaction F (5, 100) = 1.892 , p=0.1023	Sidak Multiple Comparison (WT vs. KO)	10 t(120)=4.688, p<0.0001		16.7273	2.12385	41.1818	4.17529
				Time F (5, 100) = 25 , p<0.0001		20 t(120)=5.49, p<0.0001		11.6364	2.05503	40.2727	4.02739
				Genotype F (1, 20) = 25.57 , p<0.0001		30 t(120)=4.741, p<0.0001		9.09091	2.09091	33.8182	4.87446
						40 t(120)=4.41, p=0.0001		5.45455	1.43567	28.4545	5.45954
						50 t(120)=3.712, p=0.0019		3	0.76277	22.3636	4.63636
						60 t(120)=3.503, p=0.0039		3.18182	1.80815	21.4545	5.95798
not shown	Center Time	WT: n=11, KO: n=11	2-WAY RM ANOVA (genotype X time (RM))	Interaction F (5, 100) = 0.5144, p=0.7648	Sidak Multiple Comparison (WT vs. KO)	10 t(120)=5.132, p<0.0001		209.909	24.9454	436.855	20.8212
				Time F (5, 100) = 10.47, P<0.0001		20 t(120)=5.331, p<0.0001		164.036	24.1602	399.809	24.294
				Genotype F (1, 20) = 6.743, p<0.0001		30 t(120)=5.675, p<0.0001		133.382	23.1412	384.373	22.7805
						40 t(120)=6.263, p<0.0001		91.1909	23.8585	368.155	39.265
						50 t(120)=6.345, p<0.0001		56.8273	18.0698	337.427	42.4881
						60 t(120)=6.15, p<0.0001		55.3182	27.9651	327.318	58.5336
d.	Breakpoint	WT: n=8, KO: n=8	2-WAY RM ANOVA (genotype X day(RM))	Interaction F (9, 126) = 2.18 , p=0.0276	Sidak Multiple Comparison (WT vs. KO)	1 t(140)=1.459, p=0.7956		40.125	4.44184	72.75	11.7728
				Day F (9, 126) = 3.06 , p=0.0024		2 t(140)=2.711, p=0.0729		46.625	4.25918	107.25	22.0663
				Genotype F (1, 14) = 17.83 , p=0.0009		3 t(140)=3.695, p=0.0031		35.5	4.38341	118.125	27.5392
						4 t(140)=4.03, p=0.0009		35.75	6.08496	125.875	26.7618
						5 t(140)=4.209, p=0.0005		36.125	5.38662	130.25	26.6945
						6 t(140)=4.259, p=0.0004		40.5	6.67083	135.75	18.862
						7 t(140)=3.488, p=0.0065		55	8.45788	133	20.3373
						8 t(140)=4.282, p=0.0003		43.75	8.32541	139.5	20.3031
						9 t(140)=2.644, p=0.0876		35.25	6.6191	94.375	18.8091
						10 t(140)=3.449, p=0.0074		29.875	6.92933	107	15.8779
e.	Active	WT: n=8, KO: n=8	2-WAY RM ANOVA (genotype X day (RM))	Interaction F (9, 126) = 2.496 , p=0.0116	Sidak Multiple Comparison (WT vs. KO)	1 t(140)=1.331, p=0.8710		176.75	22.3621	326.875	52.9408
				Day F (9, 126) = 3.155 , p=0.0018		2 t(140)=3.075, p=0.0250		197.875	23.8398	544.625	129.257
				Genotype F (1, 14) = 19.21 , p=0.0006		3 t(140)=3.788, p=0.002		148	18.8291	575.125	128.51
						4 t(140)=4.003, p=0.0010		146.625	28.4993	598	133.435
						5 t(140)=4.753, p<0.0001		142.625	25.9112	678.5	147.271
						6 t(140)=4.355, p=0.0003		184.5	32.8291	675.5	104.6
						7 t(140)=3.677, p=0.0033		233.625	36.77	648.25	96.7723
						8 t(140)=4.339, p=0.0003		189.25	40.6113	678.5	108.594
						9 t(140)=3.06, p=0.0262		152.625	35.4144	497.625	70.1116
						10 t(140)=3.223, p=0.0157		127.625	32.8176	491	72.7061
f.	Inactive	WT: n=8, KO: n=8	2-WAY RM ANOVA (genotype X day (RM))	Interaction F (9, 126) = 0.3194 , p=0.9674	Sidak Multiple Comparison (WT vs. KO)	1 t(14)=1.088, p=0.9617		138.25	21.9949	168	40.1662
				Day F (9, 126) = 18.68 , p<0.0001		2 t(140)=1.458, p=0.7960		99.25	12.7766	139.125	47.9603
				Genotype F (1, 14) = 0.7561 , p=0.3992		3 t(140)=0.4572, p>0.99		58.375	9.55424	70.875	14.1263
						4 t(140)=0.3749p>0.99		43.875	6.58309	54.125	11.7526
						5 t(140)=0.4343, p>0.99		37.25	6.17527	49.125	14.3595
						6 t(140)=0.3978, p>0.99		39.875	8.28173	50.75	16.5343
						7 t(140)=1.047, p=0.9705		41.75	6.53493	70.375	35.3735
						8 t(140)=0.3978, p>0.99		27.375	5.64085	38.25	18.769
						9 t(140)=0.4572, p>0.99		21.875	4.94411	34.375	9.81969
						10 t(140)=0.256, p>0.99		16.375	3.07605	23.375	6.89445
g.	Reward Specfiic Satiety	WT: n=8, KO: n=8	2-WAY RM ANOVA (genotype X food status (RM))	Interaction F (1, 14) = 3.167 , p=0.0969	Sidak Multiple Comparison (Reward Hungry vs. Reward Sated)	WT t(14)=3.185, p=0.0132	Reward Hungry	44.25	11.747	77.125	10.5669
				Food Status F (1, 14) = 39.49 , p<0.0001		KO t(14)=5.702, p=0.0001	Reward Sated	13.875	3.10206	22.75	4.30428
				Genotype F (1, 14) = 4.664 , p=0.0486
h.	SCH-39166 Rotations	WT: n=11, KO: n=10	2-WAY RM ANOVA (genotype X dose (RM))	Interaction F (2, 38) = 16 , p<0.0001	Sidak Multiple Comparison (0 vs. 0.01, 0.1)	WT (0 vs. 0.01) t(38)=0.4505, p=.8809	0	23.6364	2.29336	282.8	37.2352
				Dose F (2, 38) = 22.86 , p<0.0001		WT (0 vs. 0.1) t(38)=0.8253, p=0.657	0.01	13.9091	2.46597	219.9	36.6459
				Genotype F (1, 19) = 55.75 , p<0.0001		KO (0 vs. 0.01) t(38)=2.778, p=0.0168	0.1	5.81818	1.05156	92.2	18.6897
						KO (0 vs. 0.1) t(38)=8.417, p<0.0001
i.	SCH-39166 Breakpoint	WT: n=8, KO: n=8	2-WAY RM ANOVA (genotype X dose (RM))	Interaction F (2, 28) = 1.24 , p=0.3047	Sidak Multiple Comparison (0 vs. 0.01, 0.1)	WT (0 vs. 0.01) t(28)=0.1639, p=0.9979	0	23.625	3.3324	51	7.86039
				Dose F (2, 28) = 5.033 , p=0.0136		WT (0 vs. 0.1) t(28)=0.9287, p=0.7391	0.01	25.125	5.14933	47	11.5062
				Genotype F (1, 14) = 10.82 , p=0.0054		KO (0 vs. 0.01) t(28)=0.437, 0.9626	0.1	15.125	3.76752	22.75	4.6088
						KO (0 vs. 0.1) t(28)=3.087, p=0.0388
Figure 4.
a.	PR Acquisition	WT: n=8, KO: n=8	2-WAY RM ANOVA (genotype X day (RM))	Interaction F (9, 126) = 2.832 , p=0.0046	Sidak Multiple Comparison (WT vs. KO)	1 t(140)=0, p>0.999		7	1.98206	7	1.4516
				Day F (9, 126) = 20.2 , p<0.0001		2 t(140)=0.4614, p>0.999		40.25	14.6052	27.125	19.7714
				Genotype F (1, 14) = 2.832 , p=0.1145		3 t(140)=0.9712, p=0.9826		54	24.1498	26.375	19.4504
						4 t(140)=1.591, p=0.7016		71.5	24.345	26.25	19.6557
						5 t(140)=2.593, p=0.1005		101.75	23.8678	28	22.8786
						6 t(140)=3.542, p=0.0054		144	20.2043	43.25	21.5239
						7 t(140)=2.241, p=0.2362		130	18.9096	66.25	26.836
						8 t(140)=0.4702, p>0.999		132.375	17.9721	119	30.149
						9 t(140)=0.2417, p>0.999		139.5	10.5272	132.625	24.3728
						10 t(140)=0.2593, p>0.999		144.125	9.86957	151.5	21.5398
b.	Touch Screen Acquisition	WT: n=8, KO: n=5	Unpaired T test (WT vs. KO)	t(11)=2.435, p=0.0331				4.125	0.3981	11.2	3.72
Figure 5.
a.	Hippocampus Homer1 b/c	WT: n=4, KO: n=4	Unpaired T test (WT vs. KO)	t(6)=1.748, p=0.1310				1	0.1185	0.6932	0.1295
	Hippocampus mGluR5	WT: n=4, KO: n=4	Unpaired T test (WT vs. KO)	t(6)=0.3509, p=0.7377				1	0.1428	1.087	0.2029
	Hippocampus mGluR1	WT: n=4, KO: n=4	Unpaired T test (WT vs. KO)	t(6)=0.1243, p=0.9051				1	0.09722	0.957	0.3318
b.	Hippocampus Soma size (by brain)	WT: n=5, KO: n=5	Unpaired T test (WT vs. KO)	t(8)=2.492, 0.0374				241.1	7.417	210.6	9.701
	Hippocampus Some size (by neuron)	WT: n=24, KO: n=22	Unpaired T test (WT vs. KO)	t(44)=2.429, p=0.0193				241.5	9.422	211.5	7.782
c.	Hippocampus Sholl	WT: n=5 (31 neurons) , KO: n=5 (31 neurons)	Wilcoxin signed rank test (WT vs KO)	p=0.0002			No significant single comparisons
d.	Striatum Homer1 b/c	WT: n=4, KO: n=4	Unpaired T test (WT vs. KO)	t(6)=0.09866, p=0.9246				1	0.09643	0.9838	0.1331
	Striatum mGluR5	WT: n=4, KO: n=4	Unpaired T test (WT vs. KO)	t(6)=1.665, p=0.1470				1	0.1082	0.6833	0.1565
	Striatum mGluR1	WT: n=4, KO: n=4	Unpaired T test (WT vs. KO)	t(6)=4.679, p=0.0034				1	0.06693	1.698	0.1333
e.	Striatum Soma size (by brain)	WT: n=5, KO: n=5	Unpaired T test (WT vs. KO)	t(8)=2.336, p=0.0477				226.4	7.075	260.2	12.61
	Striatum Some size (by neuron)	WT: n=32, KO: n=31	Unpaired T test (WT vs. KO)	t(61)=2.506, p=0.0149				228.1	7.135	260.6	10.96
f.	Striatum Sholl	WT: n=5 (32 neurons), KO: n=5 (31 neurons)	Wilcoxin signed rank test (WT vs KO)	p=<0.0001			Shell 4	15.3833	0.573488	17.2095	0.627931
							Shell 5	15.7083	0.530003	17.8143	0.405769
							Shell 6	15.9083	0.459544	17.5238	0.667389
Figure 6.
not shown	Hippocampal I/O curve	WT: n=8; KO: n= 9	2-WAY RM ANOVA (trial(RM) X genotype)	F(9,135)=0.2655, p=0.9827				n/a		n/a
d, e	HP LTP	WT: n=10; KO: n=9	Unpaired students t-test	t(17)=2.864, p = 0.0108				20.1	2.217	8.1	3.681
f, g	HP LTD	WT: n=6, KO: n=6	Unpaired students t-test	t(10)=2.64, p = 0.0247				27.18	6.668	3.5	5.998
a	HP AMPA/NMDA	WT: n=20 cells; KO: n=18 cells	Unpaired students t-test	t(36)=2.533, p = 0.0158				1.754	0.3476	0.7889	0.1086
b, c	HP NMDA currents	WT: n=20 cells; KO: n=18 cells	Unpaired students t-test	t(36)=2.6, p = 0.0134				85.77	23	166	20.08
Figure 7.
a., b.	CSTR LTD	WT: n=11 cells; KO: n=10 cells	Unpaired students t-test	t(19)=2.16, p = 0.0438				28.05	4.97	42.98	4.75
Figure 8.
a.	Spectral power	WT: n=7; KO: n=8	2-WAY RM ANOVA (power band (RM) X genotype)	Interaction F (4, 52) = 5.335 , p=0.0011	Sidak Multiple Comparison (WT vs. KO)	delta t(65)=4.839, p<0.0001		9.44286e-09	1.66157e-09	4.6425e-09	3.86744e-10
				Frequency Band F (4, 52) = 32.2 p<0.0001		theta t(65)=0.238, p=0.9998		2.83857e-09	2.8956e-10	2.6025e-09	4.13062e-10
				Genotype F (1, 13) = 5.692 , p=0.0329		alpha t(65)=0.3377, p=0.9987		1.48e-09	1.54134e-10	1.145e-09	1.03021e-10
						beta t(65)=0.1342, p>0.9999		1.38486e-09	1.33491e-10	1.25175e-09	1.41861e-10
						low gamma t(65)=1.943, p=0.2519		2.511e-09	1.52481e-09	5.84e-10	6.82775e-11
b.,c.	S1 p120 Amplitude	WT: n=7; KO: n=9	Unpaired students t-test	t(14)=2.21, p=0.0443				7.886e-05	1.148e-05	0.0001214	1.438e-05
	S2 p120 Amplitude	WT: n=7; KO: n=9	Unpaired students t-test	t(14)=3.384, p=0.0045				1.857e-05	4.627e-06	4.442e-05	5.675e-06
	S1 p20 Latency	WT: n=7; KO: n=9	Unpaired students t-test	t(14)=4.278, p=0.0008				231.7	4.714	265.7	5.937
	S1 n40 Latency	WT: n=7; KO: n=9	Unpaired students t-test	t(14)=3.072, p=0.0083				275.1	10.24	246.6	2.255
	S2 p20 Latency	WT: n=7; KO: n=9	Unpaired students t-test	t(14)=2.166, p=0.0481				1218	4.38	1246	10.94
	S2n40 Latency	WT: n=7; KO: n=9	Unpaired students t-test	t(14)=2.611 p=0.0205				1277	9.108	1252	4.394
Figure 9.
c.	CSTR LTD with mGLUR1 antag	WT VEH: n=11 cells WT JNJ: n=12 cells KO VEH: n=10 cells KO JNJ: n=11 cells	2 way ANOVA	Treatment F(1,40)=19.65, p<0.0001	Unpaired students t-test	WT VEH vs WT antag t(21)=2.596, p = 0.0169
					Unpaired students t-test	KO VEH vs KO antag t(19)=3.708, p = 0.0015	0	28.05	4.978	42.98	4.75
					Unpaired students t-test	WT VEH vs KO antag t(20)=1.478, p = 0.1551	0.63	9.98	4.858	17.82	4.819
d.	Rotations	WT: N=10, KO: N=10	2-WAY RM ANOVA (genotype X dose (RM))	Interaction F(1,18)=23.21, p=0.0001	Sidak Multiple Comparison (0 vs. 0.63)	WT t(18)=0.7042, p=0.7402	0	37.1	3.87714	263.8	59.5373
				Dose F(1,18)=33.8, p<0.0001		KO t(18)=7.518, p<0.0001	0.63	21.7	4.74236	99.4	38.3366
				Genotype F(1,18)=10.13, p=0.0052
e.	Vertical	WT: N=10, KO: N=10	2-WAY RM ANOVA (genotype X dose (RM))	Interaction F (1, 18) = 4.615 , p=0.0456	Sidak Multiple Comparison (0 vs. 0.63)	WT t(18)=0.3767, p>0.05	0	647.9	64.7771	1575	310.192
				Dose F (1, 18) = 2.61 , p=0.1236		KO t(18)=2.661, p<0.05	0.63	835.8	667.886	247.4	54.2775
				Genotype F (1, 18) = 0.1908 , p=0.6674
f.	Social Investigation	WT: N=10, KO: N=10	2-WAY RM ANOVA (genotype X dose (RM))	Interaction F (1, 17) = 0.6402 p=0.4347	Sidak Multiple Comparison (0 vs. 0.63)	WT t(17)=0.5254, p>0.05	0	68475	5429.4	43264.8	6183.25
				Dose F (1, 17) = 0.005922 p=0.9396		KO t(17)=0.6045, p>0.05	0.63	63582.9	6815.3	49198	5191.96
				Genotype F (1, 17) = 15.18 p=0.0012	Sidak Multiple Comparison (WT vs. KO)	0 t(34)=2.98, p<0.05
						0.63 t(34)=1.7, p>0.05
g.	Non-social investigation	WT: N=10, KO: N=10	2-WAY RM ANOVA (genotype X dose (RM))	Interaction F (1, 18) = 1.771 p=0.1999	Sidak Multiple Comparison (0 vs. 0.63)	WT t(18)=0.1749, p=0.9813	0	23905.4	1977.53	14636.7	1863.13
				Dose F (1, 18) = 1.174 p=0.2929		KO t(18)=1.707, p=0.1990	0.63	23363.3	3322.65	19929.1	2449
				Genotype F (1, 18) = 5.449 p=0.0314	Sidak Multiple Comparison (WT vs. KO)	0 t(36)=2.653, p<0.05
						0.63 t(36)=0.9828, p>0.05
not shown	Distance Tavelled	WT: N=10, KO: N=10	2-WAY RM ANOVA (genotype X dose (RM))	Interaction F (1, 18) = 1.864 p=0.1890	Sidak Multiple Comparison (0 vs. 0.63)	WT t(18)=0.2758, p>0.05	0	4934.7	476.291	31762.9	7794.48
				Dose F (1, 18) = 3.081 p=0.0962		KO t(18)=2.207, p>0.05	0.63	2942.9	546.223	15827.3	6954.3
				Genotype F (1, 18) = 13.72 p=0.0016
